1 **Factors associated with health decision-making autonomy on own healthcare**  
2 **among Tanzanian women: A 2022-2023 demographic health survey study**

3

4 **Authors**

5 Tausi **Haruna** <sup>1,2, \*,\$,</sup> Henry **Duah** <sup>2,\*,\$,</sup> Rebecca **Lee** <sup>2,\*,\$,</sup>

6 **Affiliations**

7 <sup>1</sup> Fundamentals of Nursing and Basic Sciences, Hubert Kairuki Memorial University, Dar es  
8 Salaam, Tanzania

9 <sup>2</sup> College of Nursing, University of Cincinnati, Cincinnati, OH, USA

10 **Corresponding author:**

11 \*Tausi Haruna, Hubert Kairuki Memorial University, 70 Chwaku Street, Mikocheni, P.O. Box  
12 65300, Dar es Salaam, Tanzania

13 Twitter: [@Tausi460634](#)

14 Email: [harunats@mail.uc.edu](mailto:harunats@mail.uc.edu)

15 **Other authors**

16 <sup>\$</sup>Henry Ofori Duah made an equal contribution to this manuscript

17 [duahho@mail.uc.edu](mailto:duahho@mail.uc.edu)

18 [X\(Twitter\) handle](#)

19 [@oduahhenry](#)

20 <sup>\$</sup>Rebecca Lee

21 [lee2rc@mail.uc.edu](mailto:lee2rc@mail.uc.edu) revised manuscript before submission

22

23

24

25

26 **Abstract**

27 **Background:** Women's health decision-making autonomy is fundamental for the health and  
28 well-being of women and their children. Like most parts of Africa, women's status in  
29 Tanzania remains contentious, with an estimated 19% prevalence of health decision-making  
30 autonomy in 2015. Given that women's health decision-making autonomy is an ongoing  
31 process affected by technological and economic growth and social and cultural changes,  
32 understanding the sociodemographic correlates of women's autonomy is imperative.

33 **Objective:** To examine the factors associated with health decision-making autonomy on their  
34 own health among Tanzanian women aged 15-49.

35 **Methods:** A non-experimental cross-sectional study using secondary data from the current  
36 Tanzania Demographic and Health Survey and Malaria Indicator Survey (TDHS-MIS) 2022-  
37 2023. The R statistical programming language was used to run the analysis. Chi-square and  
38 Ordinal Logistic Regression were fitted to identify the sociodemographic characteristics  
39 associated with women's health decision-making autonomy on their own health. The odds  
40 ratio with its 95% confidence interval was used to determine the significance level at p-value  
41 <0.05. All estimates were adjusted for sample design (sample weight, strata, and sampling  
42 units)

43 **Results:** A total of 9,249 women were included in the analysis. Only 1,908 (21%) had  
44 complete autonomy, 4,933 (53%) had joint autonomy, and 2,408 (26%) had no autonomy.  
45 Women's age, education level, household wealth index, and living in the South West  
46 Highlands zone were factors independently associated with higher odds of complete  
47 autonomy in their own healthcare. Rural residence was associated with decreased odds of  
48 complete autonomy.

49 **Conclusion:** These results show that health decision-making autonomy among Tanzanian  
50 women remains very low. Efforts to empower women through better education and means to

51 improve their economic status are needed to increase complete health decision-making

52 autonomy on their health.

53 **Recommendation:** Accelerated and concerted efforts to increase health decision-making

54 autonomy among married women will eventually improve their health and well-being and

55 that of society.

56 **Future implication:** The findings can serve as a basis for exploratory qualitative research to

57 further understand the process of health decision-making autonomy among Tanzanian

58 women.

59 **Keywords: Women's Autonomy; Female autonomy; Health decision-making;**

60 **Demographic characteristics**

61

62

63

64

65

66

67

68

69

70

71

72

73

74

75

76

## Introduction

77

78

79

80

81

82

83

84

Women's health decision-making autonomy is fundamental for the health and well-being of women and their children. It facilitates access to knowledge, power, and socio-cultural resources within the family and community. Women's autonomy in healthcare decision-making is one of the indicators of women's health outcomes and empowerment [1,2]. The Sustainable Development Goals (SDGs) set a target to reduce maternal mortality to less than 70 deaths per 100,000 live births in 2023. Without paying attention to women's health decision-making autonomy, efforts to achieve this goal and improve women's health outcomes may be compromised [3].

85

86

87

88

89

90

91

92

93

94

95

96

97

Women's autonomy is a multifaceted concept comprising cultural, social structures, and economic dimensions [4]. Because of its multidimensional nature, there is no single acceptable definition of women's autonomy. Studies on women's autonomy defined it according to context, situation, and purpose [5,6]. Dyson and Moore, 1983 referred to women's autonomy as *the technical, social, and psychological ability to obtain information and use it as the basis for making decisions about one's private concerns and those of one's intimates* [7]. Basu defined women's autonomy as the capacity and freedom to act independently, for instance, the ability to go places, such as health facilities or markets, or to make decisions regarding contraceptive use or household purchases alone and without asking anyone's permission [8]. Mason defined it as women's ability to make and execute independent decisions pertaining to personal matters of importance to their lives and families [9]. With regard to the healthcare context, women's autonomy in this study is defined as the ability of women to make independent decisions on their own healthcare [10].

98

99

100

Existing studies in low and middle-income countries (LMICs) show a close correlation between women's socio-demographic characteristics and health decision-making autonomy [11–14]. A study among Nigerian women examining the perceived health

101 decision-making autonomy about their own healthcare found that geographical region,  
102 rural/urban residence, age, education, religion, wealth index, and occupation independently  
103 associated with women's health decision-making autonomy [15]. Nigatu et al., 2014 and  
104 Singh et al., 2015, reported that women with a higher wealth index are more likely to have  
105 choices regarding their own healthcare compared to their counterparts [5,16]. In Tanzania, a  
106 study by Masawe et al., 2019 found that women with secondary and post-secondary  
107 education, older and employed, tend to be more autonomous [14]. Similar findings were  
108 reported in Nepal, where women with increased education, employment, and a higher number  
109 of living children were associated with increased autonomy in decision-making [13]. Few  
110 studies in Tanzania have addressed the dynamics associated with decision-making autonomy,  
111 including the various country's zones.

112 Like most parts of Africa, women's status in Tanzania remains contentious, with an  
113 estimated 19% prevalence of health decision-making autonomy in 2015 [14]. This signifies  
114 that women have low autonomy in health decision-making. Decisions on maternal healthcare  
115 are often made with their husbands/partners or someone else, which negatively influences  
116 maternal and child healthcare utilization [17]. Government, non-government, and  
117 international efforts that promote women's autonomy in health decision-making have been  
118 employed [18]. The Tanzanian government has been striving to implement policies that  
119 promote equality and women's rights and encourage the participation of women in decision-  
120 making [19]. The government also enforces strategies that promote access to education for  
121 girls and women and enhance women's participation in higher education and economic  
122 empowerment by focusing on programs that seek to improve women's financial  
123 independence [18].

124 Considering all these efforts and given that women's health decision-making  
125 autonomy is an ongoing process affected by technological and economic growth and social

126 and cultural changes, understanding the sociodemographic correlates of women's autonomy  
127 is imperative. Therefore, this study examined the relationship between health decision-  
128 making autonomy and sociodemographic characteristics among Tanzanian women of  
129 reproductive age 15-49. This relationship becomes particularly important as various  
130 programs in low-income countries, including Tanzania, seek to improve women's health  
131 outcomes by increasing women's autonomy in health decision-making. The study addressed  
132 the following questions: 1) To what extent and whether socio-demographic characteristics  
133 (age, education, residence, wealth index, and zones of country) are independently associated  
134 with health decision-making autonomy? The study hypotheses were: 1) There is a significant  
135 association between sociodemographic factors and health decision-making autonomy. 2)  
136 There are regional/zone differences in Tanzanian women's decision-making autonomy about  
137 their own healthcare.

## 138 **Method**

### 139 **Design**

140 This was a secondary data analysis of the Tanzania Demographic and Health Survey  
141 and Malaria Indicator Survey (TDHS-MIS) 2022. Data from the TDHS-MIS 2022 individual  
142 recode documentation were specifically used for this study. The TDHS-MIS is a nationwide  
143 survey conducted every five years. The original TDHS-MIS 2022 was undertaken by the  
144 Tanzanian National Bureau of Statistics (NBS) and the Office of the Chief Government  
145 Statistician Zanzibar (OCGS) in collaboration with affiliate governmental agencies, including  
146 the Ministries of Health (MoH) of Tanzania, both in the Mainland and Zanzibar, and the  
147 Tanzania Food and Nutrition Centre (TFNC) amongst other agencies. Technical assistance  
148 for the survey was provided by ICF international. The 2022 TDHS-MIS was undertaken  
149 using a multistage sampling design. The initial phase involved the selection of clusters  
150 (primary sampling units), which comprised enumeration areas defined during the 2012

151 Population and Housing Census. In all, 629 clusters were selected in phase 1, comprising  
152 211 and 418 from urban and rural areas, respectively. The second phase involved  
153 systematically selecting households from the selected clusters during phase 1. Averagely, 26  
154 households were selected from each cluster, making a projected total of 16,354 households  
155 for the survey. All women in their reproductive age (15-49 years) in selected households  
156 were eligible for participation, and those who consented were interviewed on a range of  
157 individual and population health issues, including themes on health decision-making  
158 autonomy.

### 159 **Characteristics of participants**

160 All women of reproductive age from all regions in Tanzania. According to the World  
161 Health Organization (WHO), women of reproductive age are all women aged 15-49 years  
162 married or in union [3]. Study participants were selected to fit the eligibility criteria under the  
163 study: 1) women who were married or living with a partner at the time of the interview, 2)  
164 responded to the question, who usually decides on the respondent's healthcare. A total of  
165 9,249 women met these criteria.

### 166 **Study variables and measurements**

#### 167 **Outcome Variable**

168 The outcome variable for this study was women's health decision-making autonomy.  
169 This variable was measured by using survey questionnaires in the TDHS-MIS data. This was  
170 obtained from the variable "decisions on personal health care." Women were asked, "Who  
171 usually decides on the respondent's healthcare?" Five responses were recorded, "responded  
172 alone," "respondent and partner," "husband/partner alone," "someone else," and "other." This  
173 was recoded at trilevel as "respondent alone =complete autonomy =1", "respondent and  
174 partner =joint autonomy =2", "partner alone =no autonomy =4", and "someone else =no  
175 autonomy=5". Respondents who answered "others" were dropped. Therefore, the three levels

176 of autonomy considered in this study were “*No Autonomy*,” “*Joint Autonomy*,” and  
177 “*Complete Autonomy*.” For this study, a woman’s autonomy was defined as the capacity of  
178 the woman to decide alone on their healthcare [10].

### 179 **Independent Variables**

180 The key explanatory variables for this study were the respondent’s sociodemographic  
181 characteristics. The woman’s age, level of education, place of residence, household wealth  
182 index, and country’s zones. All explanatory variables were categorical variables. The wealth  
183 index in the DHS data was a composite variable measure of a household's cumulative living  
184 standard and relative wealth, calculated using data on the household’s ownership of selected  
185 assets, including types of water access and sanitation facilities, televisions and bicycles, and  
186 materials for housing construction among others assets. The resulting index was then  
187 presented in ordered categories: poorest, poorer, middle, richer, and richest. For statistical  
188 analysis, several variables were recoded into categories. The woman’s age was recoded into  
189 quinary age groups: 15-19 years, 20-24 years, 25-29 years, 30-34 years, 35-39 years, 40-44  
190 years, and 45-49 years. Women aged 15-19 years were a reference group. The woman’s level  
191 of education was recoded as no education =0, primary =1, secondary =2, higher =3, whereas  
192 no education was a reference group: place of residence recoded as urban= 1, rural =2; urban  
193 was a reference group: household wealth index as poorest =1, poorer =2, middle=3, richer=4,  
194 and richest =5; whereas poorest was our reference group: and zones were recoded as Western  
195 =1, Northern=2, Central =3, Southern Highlands =4, Southern =5, Southwest Highlands =6,  
196 Lake=7, Eastern =8, and Zanzibar =9: the Western zone was the reference group.

### 197 **Statistical Analysis**

198 The R statistical programming language was used to perform the analysis. Data were  
199 imported into R programming language and cleaned using the appropriate packages in R.  
200 Descriptive statistics were calculated using frequencies. A chi-square was used to describe

201 the sociodemographic characteristics of the respondents and their association with women's  
202 health decision-making autonomy on their own health (See Table 1). A multivariable Ordinal  
203 Logistic Regression was used to assess the independent association between the explanatory  
204 and outcome variables. The variable selection in the regression model was determined by  
205 their significance associated with health decision-making autonomy at the bivariate analysis  
206 or as reported in the previous studies [14,15]. The Ordinal Logistic Regression was  
207 conducted using a single multivariable model. The coefficients were exponentiated to derive  
208 adjusted odds ratios (AORs) and corresponding 95% Confidence Intervals (CI) estimates.  
209 Statistically significant results were pegged at 0.05 alpha level. All univariate, bivariate, and  
210 multivariable analyses accounted for complex survey design.

#### 211 **Ethical approval**

212 The ethical approval for the DHS was the Institutional Review Board (IRB) of ICF  
213 International and the National Institute of Medical Research (NIMR), Tanzania. Field agents  
214 obtained informed consent from all eligible women prior to enrollment in the survey. The PI  
215 was granted permission to use the de-identified secondary data through online registration at  
216 the DHS website as <https://www.dhsprogram.com/>. No additional consent was required from  
217 participants in this secondary data analysis.

### 218 **Results**

#### 219 **Participants characteristics**

220 A total sample size of 9,249 participants was included in this study. The participants were all  
221 married females aged 15-49 years drawn from 31 regions of Tanzania Mainland, and  
222 Zanzibar. A large proportion (20%) of women aged 25-29. The majority of women reside in  
223 rural areas, 69%. About 58% of women had attained a primary education. Most of the women  
224 came from the Lake zone (30%). It was observed that 23% of women were from the richest  
225 households. (See Table 1)

226 Table 1

227 *Sociodemographic Characteristics of Participants (N=9249)*

| <b>Variable</b>                        | <b>Frequency (n)</b> | <b>Percentage (%)</b> |
|----------------------------------------|----------------------|-----------------------|
| <b>Age -years</b>                      |                      |                       |
| 15-19                                  | 563                  | 6.1                   |
| 20-24                                  | 1,612                | 17                    |
| 25-29                                  | 1,894                | 20                    |
| 30-34                                  | 1,616                | 17                    |
| 35-39                                  | 1,427                | 15                    |
| 40-44                                  | 1,181                | 13                    |
| 45-49                                  | 954                  | 10                    |
| <b>Place of residence</b>              |                      |                       |
| Urban                                  | 2,894                | 31                    |
| Rural                                  | 6,355                | 69                    |
| <b>Education</b>                       |                      |                       |
| No education                           | 1,887                | 20                    |
| Primary                                | 5,395                | 58                    |
| Secondary                              | 1,861                | 20                    |
| Higher                                 | 106                  | 1.1                   |
| <b>Wealth index</b>                    |                      |                       |
| Poorest                                | 1715                 | 19                    |
| Poorer                                 | 1713                 | 19                    |
| Middle                                 | 1760                 | 19                    |
| Richer                                 | 1970                 | 21                    |
| Richest                                | 2090                 | 23                    |
| <b>Zones</b>                           |                      |                       |
| Western                                | 806                  | 8.7                   |
| Northern                               | 1058                 | 11                    |
| Central                                | 948                  | 10                    |
| Southern Highlands                     | 541                  | 5.8                   |
| Southern                               | 453                  | 4.9                   |
| Southwest Highlands                    | 862                  | 9.3                   |
| Lake                                   | 2774                 | 30                    |
| Eastern                                | 1519                 | 16                    |
| Zanzibar                               | 287                  | 3.1                   |
| <b>Health decision making autonomy</b> |                      |                       |
| No autonomy                            | 2408                 | 26                    |
| Joint autonomy                         | 4933                 | 53                    |
| Complete autonomy                      | 1908                 | 21                    |

228 **Health decision-making autonomy about own healthcare**

229 Only 21% of women reported being completely autonomous regarding decisions on their own

230 health care, while the majority (53%) of women reported that health decisions about their

231 own healthcare were made jointly, and 26% reported health decisions were made by  
 232 husbands/partners alone and someone else.

233 **Factors associated with health decision-making autonomy on own healthcare**

234 Chi-square was conducted to answer whether a relationship exists between sociodemographic  
 235 characteristics and women's health decision-making autonomy. Results show that age,  
 236 education level, place of residence, level of household wealth index, and country's zones  
 237 were statistically significantly associated with health decision-making autonomy. See Table 2

238 **Table 2**

239 *Factors related to health decision-making autonomy on own healthcare (N=9249)*

| <b>Variable</b>           | <b>No autonomy<br/>2409<sup>1</sup></b> | <b>Joint autonomy<br/>4933<sup>1</sup></b> | <b>Complete<br/>autonomy<br/>1908<sup>1</sup></b> | <b>p-<br/>value<sup>2</sup></b> |
|---------------------------|-----------------------------------------|--------------------------------------------|---------------------------------------------------|---------------------------------|
| <b>Age -years</b>         |                                         |                                            |                                                   | <b>&lt;.001</b>                 |
| 15-19                     | 227 (9.4)                               | 269 (5.5)                                  | 68 (3.5)                                          |                                 |
| 20-24                     | 532 (22)                                | 803 (16)                                   | 277 (15)                                          |                                 |
| 25-29                     | 496 (21)                                | 1083 (22)                                  | 315 (17)                                          |                                 |
| 30-34                     | 382 (16)                                | 896 (18)                                   | 337 (18)                                          |                                 |
| 35-39                     | 351 (15)                                | 718 (15)                                   | 357 (19)                                          |                                 |
| 40-44                     | 220 (9.1)                               | 633 (13)                                   | 329 (17)                                          |                                 |
| 45-49                     | 199 (8.3)                               | 530 (11)                                   | 224 (12)                                          |                                 |
| <b>Place of residence</b> |                                         |                                            |                                                   | <b>&lt;.001</b>                 |
| Urban                     | 471 (20)                                | 1600(32)                                   | 823( 43)                                          |                                 |
| Rural                     | 1937 (80)                               | 3333(68)                                   | 1084 (57)                                         |                                 |
| <b>Education</b>          |                                         |                                            |                                                   | <b>&lt;.001</b>                 |
| No education              | 767 (32)                                | 784 (16)                                   | 335 (18)                                          |                                 |
| Primary                   | 1341 (56)                               | 2959 (60)                                  | 1095 (57)                                         |                                 |
| Secondary                 | 297 (12)                                | 1121 (23)                                  | 442 (23)                                          |                                 |
| Higher                    | 2 (<.1)                                 | 68 (1.4)                                   | 36 (1.9)                                          |                                 |
| <b>Wealth index</b>       |                                         |                                            |                                                   | <b>&lt;.001</b>                 |
| Poorest                   | 717 (30)                                | 740 (15)                                   | 258 (14)                                          |                                 |
| Poorer                    | 534(22)                                 | 873 (18)                                   | 307 (16)                                          |                                 |
| Middle                    | 452(19)                                 | 1000 (20)                                  | 309 (16)                                          |                                 |
| Richer                    | 396(16)                                 | 1139 (23)                                  | 435 (23)                                          |                                 |
| Richest                   | 308(13)                                 | 1182 (24)                                  | 599 (31)                                          |                                 |
| <b>Zones</b>              |                                         |                                            |                                                   | <b>&lt;.001</b>                 |
| Western                   | 484 (20)                                | 217 (4.4)                                  | 105 (5.5)                                         |                                 |
| Northern                  | 212 (8.8)                               | 613 (12)                                   | 234 (12)                                          |                                 |
| Central                   | 153 (6.4)                               | 582 (12)                                   | 213 (11)                                          |                                 |
| Southern Highlands        | 50 (2.1)                                | 423 (8.6)                                  | 68 (3.6)                                          |                                 |
| Southern                  | 62 (2.6)                                | 321 (6.5)                                  | 71 (3.7)                                          |                                 |

|                     |          |           |          |  |
|---------------------|----------|-----------|----------|--|
| Southwest Highlands | 84 (3.5) | 575 (12)  | 202 (11) |  |
| Lake                | 892 (37) | 1318 (27) | 563 (30) |  |
| Eastern             | 407 (17) | 739 (15)  | 373 (20) |  |
| Zanzibar            | 64 (2.7) | 144 (2.9) | 79 (4.1) |  |

240 Note: <sup>2</sup>=chi-squared test with Rao and Scott's second order of correction; <sup>1</sup>=n (%)

## 241 **Multivariable Ordinal Logistic Regression**

242 Three categories were formed depending on how women's autonomy in health decision-  
243 making is constructed in the literature [5,6]. In our analysis, we were interested in modeling  
244 the predictors for complete autonomy as a higher level of health decision-making autonomy  
245 among women. Therefore, the ordinal logistic regression was conducted to specify the higher  
246 hierarchy of women's health decision-making autonomy, i.e., complete autonomy.

247 Generally, the odds of having complete autonomy were greater with increasing age of  
248 women. For example, the odds of women having complete health decision-making autonomy  
249 was 2.53 times greater for women who were 40-44 years old compared to those 15-19 years  
250 old, holding other variables constant. Likewise, the odds of having complete autonomy was  
251 greater with increasing levels of formal education relative to no formal educations. For  
252 example, the odds of women having complete autonomy was 2.39 times greater for women  
253 who had attained higher education than those with no formal education. Similarly, the odds of  
254 having complete autonomy was greater with increasing levels of household wealth index. For  
255 instance, the results showed that the odds of being completely autonomous increased by 81%  
256 among women from the richest households relative to their counterparts from the poorest  
257 households. There were zonal variations autonomy status of women in Tanzania. Notably, the  
258 odds of having complete autonomy were 5.82 times greater for women from the Southwest  
259 Highlands compared to the Western zone. On the contrary, women who resided in rural areas  
260 had 38% reduced odds of having complete autonomy compared to their urban counterparts.

261 See Table 3 for more details.

262

263 **Table 3**

264 *Multivariate Ordinal Logistic Regression on factors related to women's health decision-*  
 265 *making autonomy on their own healthcare.*

| <b>Variable</b>           | <b>Unadjusted OR</b> | <b>95% CI</b> |
|---------------------------|----------------------|---------------|
| <b>Age -years</b>         |                      |               |
| 15-19                     | 1                    |               |
| 20-24                     | 1.28                 | [1.04, 1.57]  |
| 25-29                     | 1.43                 | [1.15, 1.77]  |
| 30-34                     | 1.72                 | [1.39, 2.14]  |
| 35-39                     | 2.06                 | [1.62, 2.59]  |
| 40-44                     | 2.53                 | [2.01, 3.18]  |
| 45-49                     | 2.18                 | [1.73, 2.75]  |
| <b>Place of residence</b> |                      |               |
| Urban                     | 1                    |               |
| Rural                     | 0.62                 | [0.49, 0.78]  |
| <b>Education</b>          |                      |               |
| No education              | 1                    |               |
| Primary                   | 1.38                 | [1.17, 1.63]  |
| Secondary                 | 1.72                 | [1.38, 2.14]  |
| Higher                    | 2.39                 | [1.61, 3.55]  |
| <b>Wealth index</b>       |                      |               |
| Poorest                   | 1                    |               |
| Poorer                    | 1.44                 | [1.21, 1.71]  |
| Middle                    | 1.39                 | [1.16, 1.67]  |
| Richer                    | 1.63                 | [1.34, 1.98]  |
| Richest                   | 1.81                 | [1.41, 2.33]  |
| <b>Zones</b>              |                      |               |
| Western                   | 1                    |               |
| Northern                  | 4.00                 | [3.03, 5.29]  |
| Central                   | 4.98                 | [3.71, 6.67]  |
| Southern Highlands        | 3.64                 | [2.85, 4.67]  |
| Southern                  | 4.13                 | [3.11, 5.49]  |
| Southwest Highlands       | 5.82                 | [4.48, 7.58]  |
| Lake                      | 2.66                 | [2.08, 3.40]  |
| Eastern                   | 2.35                 | [1.77, 3.14]  |
| Zanzibar                  | 3.16                 | [2.42, 4.12]  |

266

267

**Discussion**

268

This study sought to determine whether women's sociodemographic characteristics

269

correlated with decision-making autonomy on their own health. The results show that

270

women's age, level of education, household wealth index, and country's zones independently

271 correlated with health decision-making autonomy on their own health. The odds of being  
272 completely autonomous in health decision-making increased with age, formal education  
273 level, and household wealth index. The country's zones were also a determinant factor for  
274 women's complete autonomy in health decision-making. Women living in rural areas had  
275 reduced complete autonomy in health decision-making on their own health compared to their  
276 counterparts. Furthermore, the findings showed only 21% of Tanzanian women were  
277 completely autonomous in health decision-making on own health. It was, however,  
278 noteworthy that the majority of the women's health decision-making was done with  
279 husbands/partners (53%) and with someone else (24%).

280 A study conducted in Tanzania by Masawe et al., (2019) reported a 19% prevalence  
281 of health decision-making autonomy among married women [14]. The current study  
282 established a 21% prevalence of complete health decision-making autonomy among women.  
283 This implied that the women in Tanzania still have limited complete autonomy in making  
284 health decisions on their own healthcare. This may be partly attributed to social and cultural  
285 norms, religious beliefs, and values influencing how women live and interact with their  
286 husbands/partners [20]. It can also be due to the social constructs and gender roles that many  
287 developing countries like Tanzania practice that restrict women's full participation in  
288 decisions that affect their health [1,2]. A similar pattern was observed in South Asian  
289 countries (Nepal, Bangladesh, and India), where only a small proportion of women (13.4%,  
290 17.6%, and 21.1%, respectively) made health decisions on their healthcare [21].

291 Women's age was positively associated with complete autonomy in their health  
292 decision-making. Similar findings have been reported in many studies using a national  
293 representative sample like ours in LMICs [13–15]. In Nepal, Bangladesh, and India, as  
294 women's age increases, the autonomy in household decisions autonomy increases [21]. The  
295 possible reasons associated with this increase include that as women get older, their level of

296 maturity increases, and therefore, they gain more independence in decisions and power  
297 [5,13].

298 This study also found a strong association between women's level of education and  
299 complete autonomy in healthcare decisions. It was observed that as the level of formal  
300 education increases, the chances of being completely autonomous in one's health decisions  
301 increased. Higher-educated women were twice as likely to have complete autonomy than  
302 those without. This finding is consistent with a study in Nigeria, where higher-educated  
303 women were 1.57 times more likely to make decisions alone than those without [15].

304 The household wealth index affects women's health decision-making autonomy.  
305 Women from richest households were 1.81 times likely to make decisions alone than women  
306 from poorest households. This is similar to the studies conducted in Ethiopia and Nigeria  
307 [5,15]. In Ghana, it was reported that the wealth index influences maternal healthcare  
308 utilization [22,23].

309 The strongest magnitude of association observed with women's decision-making  
310 autonomy was the country zones. As we hypothesized, country zones were an important  
311 determinant for Tanzanian women's decision-making autonomy, even after controlling for  
312 other factors. Tanzania is divided into nine zones (Western, Northern, Central, Southern  
313 Highlands, Southern, Southwest Highlands, Lake, Eastern, and Zanzibar). Women living in  
314 the Southwest Highlands were five times more likely to decide alone on matters affecting  
315 their health compared with the Western zones. This study lays the groundwork for this  
316 particular finding. A study conducted in Tanzania by Masawe et al. (2019) did not assess the  
317 country's zone as a determinant for women's health decision-making autonomy in their own  
318 healthcare. Other studies in African countries [15,24–26] have also found that geographical  
319 locations were independently associated with women's autonomy. These findings imply that  
320 there are factors associated with geographical locations that are yet to be explicated. A study

321 in India reported that women in the Southern regions of India have more exposure to the  
322 outside world, a greater voice in family life, and more freedom of movement than those in the  
323 north [8,27]. Osamor and Grady (2018) found that Nigerian women from the South West  
324 region were 8.3 times more likely to make their own healthcare decisions than women from  
325 the North West region [15]. Very little is known about the influence of zones and women's  
326 health decisions in Tanzania. But family life in Tanzania, like most parts of African  
327 countries, is guided by descriptive norms and belief systems that derive from culture and  
328 ethnicity. Cultural norms, social norms, and beliefs are central components of regional  
329 variations that may partly explain the independent influence of region on women's autonomy.

330 Women who resided in rural areas were significantly less likely to make their own  
331 health decisions than those from urban areas. These findings were consistent with others  
332 conducted in LMICs [5,13–15]. The role of place of residence in decision-making has now  
333 been documented beyond doubt in affecting the health of individuals living there. In  
334 Tanzania, about (66%) of the population live in rural areas. The geographic isolation of rural  
335 populations and the challenges they face in meeting basic social services, economic  
336 opportunities, and healthcare services are profound.

### 337 **Strengths and limitations**

338 This study has several strengths and weaknesses. One key strength is the  
339 representative nature of the data among the Tanzanian women population. To the author's  
340 best knowledge, this is the first study in Tanzania using nationally representative data to  
341 establish the findings on the country's zone as the strongest determinant of women's health  
342 decision-making autonomy in their own healthcare.

343 The study had the following limitations. Because this was a cross-sectional study, a  
344 causal relationship between sociodemographic characteristics (explanatory variables) and  
345 health decision-making autonomy (outcome variable) can not be established. Therefore, the

346 conclusion of this paper was based on the association relationship between the explanatory  
347 and outcome variables. Since this study was a secondary data analysis, the responses were  
348 subjected to recall biases. Also, the nature of the survey questions (closed-ended) has limited  
349 the ability to capture the context and nuance of the responses. For example, in this study, we  
350 interpreted health decisions made by a woman alone as the higher hierarchy representing  
351 women's autonomy, which could also indicate a lack of support from the husband/partner. To  
352 assert this interpretation appropriately, follow-up qualitative prompts are needed to clarify  
353 this ambiguity.

### 354 **Conclusion**

355 The results show that health decision-making autonomy on healthcare among  
356 Tanzanian women remains very low. More than half of married women in Tanzania reported  
357 having no capacity to decide on matters related to their own healthcare. Factors associated  
358 with women's health decision-making autonomy include; women's age, level of education,  
359 place of residence, household wealth index, and the country's zones. Interventions and  
360 policies targeting modifiable factors such as education and income-generating activities that  
361 increase women's decision-making autonomy will improve their health outcomes and that of  
362 the family and community. Further qualitative research are needed to explores how women  
363 interact and navigate various components of health decisions (maternal health, clinic visits,  
364 blood transfusion, etc).

### 365 **Recommendations**

366 Accelerated and concerted efforts to increase health decision-making autonomy among  
367 married women will eventually improve their health and well-being and that of society.

### 368 **Acknowledgment**

369 The authors would like to thank the DHS program for approving the use of these data to  
370 advance scientific knowledge on women's autonomy in Tanzania.

371  
372  
373  
374  
375  
376  
377  
378  
379  
380  
381  
382  
383  
384  
385  
386  
387  
388  
389  
390  
391  
392  
393  
394  
395

## Reference

1. Garrison-Desany HM, Wilson E, Munos M, Sawadogo-Lewis T, Maïga A, Ako O, et al. The role of gender power relations on women’s health outcomes: evidence from a maternal health coverage survey in Simiyu region, Tanzania. *BMC Public Health*. 2021;21: 1–16. doi:10.1186/s12889-021-10972-w
2. Woldemicael G, Tenkorang EY. Women’s autonomy and maternal health-seeking behavior in Ethiopia. *Matern Child Health J*. 2010;14: 988–998. doi:10.1007/s10995-009-0535-5
3. WHO. Maternal mortality fact sheet. In: World Health Organization. 2014. doi:[https://apps.who.int/iris/bitstream/handle/10665/112318/WHO\\_RHR\\_14.06\\_eng.pdf](https://apps.who.int/iris/bitstream/handle/10665/112318/WHO_RHR_14.06_eng.pdf)
4. Bloom SS, Wypij D, Das Gupta M. Dimensions of women’s autonomy and the influence on maternal health care utilization in a north India city. *Demography*. 2001;38: 67–78. Available: <https://doi.org/10.1353/dem.2001.0001>
5. Nigatu D, Gebremariam A, Abera M, Setegn T, Deribe K. Factors associated with women’s autonomy regarding maternal and child health care utilization in Bale Zone: A community based cross-sectional study. *BMC Womens Health*. 2014;14. doi:10.1186/1472-6874-14-79
6. Osamor P, Grady C. Women’s autonomy in health care decision-making in developing countries: a synthesis of the literature. *Int J Womens Health*. 2016;8: 191–202.
7. Dyson T, Moore M. On kinship structure , female autonomy , and demographic behavior in India. *Popul Dev Rev*. 1983;9: 35–60. Available: <https://doi.org/10.2307/1972894>
8. Basu M. Culture, the status of women, and demographic behaviour: illustrated with the case of India. Clarendon press; 1992.

- 396 9. Mason KO. The status of women: Conceptual and methodological issues in  
397 demographic studies. *Sociol Forum*. 1986;1: 284–300. doi:10.1007/BF01115740
- 398 10. Ministry of Health (MoH) TM, Ministry of Health (MoH) Z, National Bureau of  
399 Statistics N, Office of the Chief Government Statistician O, ICF. Demographic and  
400 Health Survey and Malaria Indicator Survey 2022 Final Report. Dodoma, Tanzania,  
401 and Rockville, Maryland, USA; 2022. Available:  
402 <https://dhsprogram.com/publications/publication-FR382-DHS-Final-Reports.cfm>
- 403 11. Budu E, Seidu AA, Armah-Ansah EK, Sambah F, Baatiema L, Ahinkorah BO.  
404 Women’s autonomy in healthcare decisionmaking and healthcare seeking behaviour  
405 for childhood illness in Ghana: Analysis of data from the 2014 Ghana Demographic  
406 and Health Survey. *PLoS One*. 2020;15: 1–15. doi:10.1371/journal.pone.0241488
- 407 12. Duah HO, Adisah-Atta I. Determinants of health care decision making autonomy  
408 among mothers of children under five years in Ghana: analysis of 2014 Ghana  
409 demographic and health survey. *Res J Women’s Heal*. 2017;4: 5. doi:10.7243/2054-  
410 9865-4-5
- 411 13. Acharya DR, Bell JS, Simkhada P, Van Teijlingen ER, Regmi PR. Women’s  
412 autonomy in household decision-making: A demographic study in Nepal. *Reprod*  
413 *Health*. 2010;7: 1–12. doi:10.1186/1742-4755-7-15
- 414 14. Masawe CA, Mcharo EG, Masawe GB. Women’s autonomy in decision-making on own  
415 healthcare in Tanzania. *J Educ Humanit Sci*. 2019;8.
- 416 15. Osamor P, Grady C. Factors associated with women’s health care decision-making  
417 autonomy: Empirical evidence from Nigeria. *J Biosoc Sci*. 2018;50: 70–85.  
418 doi:10.1017/S0021932017000037
- 419 16. Singh K, Bloom S, Brodish P. Gender equality as a means to improve maternal and  
420 child health in Africa. *Health Care Women Int*. 2015;36: 57–69.

- 421 doi:10.1080/07399332.2013.824971
- 422 17. WHO. The World Health Report 2005. Make every mother and child count. 2005.
- 423 18. USAID. Gender equality and women’s empowerment. 2023 [cited 4 Mar 2024].  
424 Available: [https://www.usaid.gov/tanzania/gender-equality-and-womens-](https://www.usaid.gov/tanzania/gender-equality-and-womens-empowerment)  
425 empowerment
- 426 19. UNDP. UNDP Tanzania gender equality strategy 2022-2027. Dar es Salaam,  
427 Tanzania; 2022. Available: [https://www.undp.org/sites/g/files/zskgke326/files/2023-](https://www.undp.org/sites/g/files/zskgke326/files/2023-07/gender_equality_strategy_2022_-_2027.pdf)  
428 07/gender\_equality\_strategy\_2022\_-\_2027.pdf
- 429 20. Yeates K, Chard S, Eberle A, Lucchese A, West N, Chelva M, et al. ‘She needs  
430 permission’: A qualitative study to examine barriers and enablers to accessing  
431 maternal and reproductive health services among women and their communities in  
432 rural Tanzania. *Afr J Reprod Health*. 2021;25: 139–152.  
433 doi:10.29063/ajrh2021/v25i3s.12
- 434 21. Senarath U, Nalika Sepali Gunawardena. Women’s autonomy in decision making for  
435 health care in South Asia. *Asia-Pacific J Public Heal*. 2009;21: 137–143.  
436 doi:10.1177/1010539509331590
- 437 22. Ameyaw EK, Tanle A, Kissah-Korsah K, Amo-Adjei J. Women’s health decision-  
438 making autonomy and skilled birth attendance in Ghana. *Int J Reprod Med*.  
439 2016;2016: 1–9. doi:10.1155/2016/6569514
- 440 23. Amugsi DA, Lartey A, Kimani E, Mberu BU. Women’s participation in household  
441 decision-making and higher dietary diversity: findings from nationally representative  
442 data from Ghana. *J Health Popul Nutr*. 2016;35: 16. doi:10.1186/s41043-016-0053-1
- 443 24. Asabu MD, Altaseb DK. The trends of women’s autonomy in health care decision  
444 making and associated factors in Ethiopia: evidence from 2005, 2011 and 2016 DHS  
445 data. *BMC Womens Health*. 2021;21: 1–9. doi:10.1186/s12905-021-01517-9

- 446 25. Mare KU, Aychiluhm SB, Tadesse AW, Abdu M. Married women's decision-making  
447 autonomy on contraceptive use and its associated factors in Ethiopia: A multilevel  
448 analysis of 2016 demographic and health survey. *SAGE Open Med.* 2022;10.  
449 doi:10.1177/20503121211068719
- 450 26. Sougou NM, Bassoum O, Faye A, Leye MMM. Women's autonomy in health  
451 decision-making and its effect on access to family planning services in Senegal in  
452 2017: A propensity score analysis. *BMC Public Health.* 2020;20: 1–9.  
453 doi:10.1186/s12889-020-09003-x
- 454 27. Jejeebhoy SJ, Sathar ZA. Women's autonomy in India and Pakistan: The influence of  
455 religion and region. *Popul Dev Rev WILEY Online.* 2004;27: 687–712. Available:  
456 <https://doi.org/10.1111/j.1728-4457.2001.00687.x>  
457  
458  
459  
460
